# Supplementary material
Source: HighWire-hosted journal article supplement (https://gut.bmj.com/content/66/3/454)
Supplement: inline-supplementary-material-5 [file inline-supplementary-material-5.pdf]

| Name                     | Description                                                    | Sequence (5'-'3')                    | Strand on template | Length | Start | Stop  | Tm    | Product length |
|--------------------------|----------------------------------------------------------------|--------------------------------------|--------------------|--------|-------|-------|-------|----------------|
| APCforward               | APC and APC(1) amplification forward primer                    | GAATGGAGGTCTGCCGACTCGGAAATGG         | plus               | 30     | 9     | 39    | 70,9  |                |
| APCrev1                  | APC whole orf amplification reverse primer                     | GCATGTATCTCCATTGTTTATGGAAGCCTGG      | minus              | 31     | 10701 | 10670 | 90    | 10692          |
| APCrev2                  | APC(1) amplification reverse primer                            | TCCTCCTTGACGCTCATCTGTACTCTGC         | minus              | 29     | 5167  | 5138  | 68    | 5158           |
| up2 APC                  | APC(2) amplification forward primer                            | GGCACAGTCAGGTGAATTG                  | plus               | 20     | 5091  | 5110  | 57,3  |                |
| rev2 APC                 | APC(2) amplification reverse primer                            | GGCTCCAGAACAACAAACCCCTC              | minus              | 22     | 8731  | 8710  | 60,2  | 3640           |
| up KRAS                  | KRAS amplification forward primer                              | CATTTCCGACTGGGAGCGAG                 | plus               | 20     | 85    | 104   | 61,4  |                |
| down KRAS                | KRAS amplification reverse primer                              | CTAACAGTCTGCATGGAGCAG                | minus              | 21     | 872   | 858   | 59,8  | 787            |
| up EPH Receptor B6       | EPHRB6 amplification forward primer                            | GAGTCTTGCAAAAGCTGCAG                 | plus               | 20     | 711   | 730   | 57,3  |                |
| down EPH Receptor B6     | EPHRB6 amplification reverse primer                            | CTGAGTCACGGGTATCTGC                  | minus              | 19     | 3876  | 3858  | 58,8  | 3165           |
| up PIK3CA                | PIK3CA amplification forward primer                            | CGTTTCTGCTTGGGCAAC                   | plus               | 20     | 81    | 100   | 57,3  |                |
| down PIK3CA              | PIK3CA amplification reverse primer                            | GCAGTGTGGAATCCAGAGTG                 | minus              | 20     | 3408  | 3390  | 62,7  | 3327           |
| up TP53                  | TP53 amplification forward primer                              | CAGACTGCCTCCGGGTC                    | plus               | 18     | 227   | 245   | 60,5  |                |
| down TP53                | TP53 amplification reverse primer                              | CTGTCTGCTGGGGAACAAGAAG               | minus              | 21     | 1463  | 1441  | 59,8  | 1236           |
| up FBXW7                 | FBXW7 amplification forward primer                             | CTAGCCAAGGTCACAGAAGTAGC              | plus               | 23     | 111   | 133   | 62,4  |                |
| down FBXW7               | FBXW7 amplification reverse primer                             | GGCAGGGAGTATATGCTCTACAC              | minus              | 23     | 2324  | 2302  | 62,4  | 2213           |
| up SMAD4                 | SMAD4 amplification forward primer                             | CTTGGCAACGTTAGCTGTTG                 | plus               | 20     | 441   | 460   | 57,3  |                |
| down SMAD4               | SMAD4 amplification reverse primer                             | GTCACCACCTCTGATAAGGTTAAGG            | minus              | 25     | 2241  | 2217  | 62,9  | 1800           |
| up 1 CSM2D3              | CSMD3(1) amplification forward primer                          | ACAACAGCAACAACCTCACTGC               | plus               | 22     | 99    | 120   | 62,7  |                |
| down 1 CSM2D3            | CSMD3(1) amplification reverse primer                          | CACCACAGCAGATGATCTCTG                | minus              | 22     | 3823  | 3812  | 60,2  | 3724           |
| up 2 CSM2D3              | CSMD3(2) amplification forward primer                          | GACCTTCTCATGCTCTCGG                  | plus               | 20     | 3771  | 3790  | 59,3  |                |
| down 2 CSM2D3            | CSMD3(2) amplification reverse primer                          | GGCAGGACAGGCACTTGAC                  | minus              | 20     | 7533  | 7514  | 61,4  | 3762           |
| up 3 CSM2D3              | CSMD3(3) amplification forward primer                          | GAACGACTGCAGATGGATGG                 | plus               | 20     | 7480  | 7499  | 62,7  |                |
| down 3 CSM2D3            | CSMD3(3) amplification reverse primer                          | CTGATAGTGGATGCTCTCC                  | minus              | 20     | 11591 | 11571 | 59,3  | 4111           |
| up TNN                   | TNN amplification forward primer                               | GGTCTGCTCCCTGTCTTCC                  | plus               | 20     | 92    | 109   | 61,4  |                |
| down TNN                 | TNN amplification reverse primer                               | TGCTCTCGGAGGACTGC                    | minus              | 19     | 4044  | 4026  | 60,9  | 3952           |
| up EPH A3                | EPH A3 amplification forward primer                            | GAGATATGCTCTCACTGCC                  | plus               | 22     | 189   | 210   | 62,1  |                |
| down EPH A3              | EPH A3 amplification reverse primer                            | TTCCGTCAGAGCACTCC                    | minus              | 20     | 3207  | 3189  | 59,3  | 3018           |
| up 1 NAV3                | NAV3(1) amplification forward primer                           | GTCTACACAGACTGAGGTTAGAAGC            | plus               | 24     | 112   | 135   | 62,7  |                |
| down 1 NAV3              | NAV3(1) amplification reverse primer                           | GCTGGCATTACTGAGGAAG                  | minus              | 20     | 4004  | 3985  | 62,7  | 3892           |
| up 2 NAV3                | NAV3(2) amplification forward primer                           | CTGCTCTGCACCTAATCTGAG                | plus               | 23     | 3952  | 3974  | 62,4  |                |
| down 2 NAV3              | NAV3(2) amplification reverse primer                           | CACCTCTAGAGGGTAGATTCAAG              | minus              | 24     | 7271  | 7248  | 62,7  | 3319           |
| up 1 LAMA1               | LAMA1(1) amplification forward primer                          | TTTTTCCCCAGACCCAGGAG                 | plus               | 22     | 57    | 78    | 65,8  |                |
| down 1 LAMA1             | LAMA1(1) amplification reverse primer                          | TGAGTGTGGGCAAGTACAGG                 | minus              | 22     | 3105  | 3084  | 63,9  | 3048           |
| up 2 LAMA1               | LAMA1(2) amplification forward primer                          | GTGTCACTGTGCCAGGTGGTG                | plus               | 23     | 3020  | 2958  | 65,9  |                |
| down 2 LAMA1             | LAMA1(2) amplification reverse primer                          | GGTTTCCGCTGTAATTTCAACAGC             | minus              | 24     | 6064  | 6041  | 61    | 3044           |
| up 3 LAMA1               | LAMA1(3) amplification forward primer                          | GCAGGAAGCTCCAGGATTTGC                | plus               | 22     | 5970  | 5991  | 62,1  |                |
| down 3 LAMA1             | LAMA1(3) amplification reverse primer                          | GCAACTGATCCCACTGAGGATTTCTCC          | minus              | 26     | 9355  | 9330  | 63,2  | 3385           |
| up C10orf.137            | C10orf.137 amplification forward primer                        | GATATGCTCCCTGGATGC                   | plus               | 20     | 269   | 288   | 63,9  |                |
| down C10orf.137          | C10orf.137 amplification reverse primer                        | TTGGGACACGGCTCTGTGC                  | minus              | 20     | 3922  | 3911  | 63,4  | 3653           |
| down MAP2K7              | MAP2K7 amplification reverse primer                            | CTCTCTCTCCTCAGTCTAGGTG               | minus              | 23     | 1456  | 1434  | 59,3  |                |
| down MAP2K7              | MAP2K7 amplification reverse primer                            | CTCTCTCTCCTCAGTCTAGGTG               | minus              | 23     | 1456  | 1434  | 59,3  | 1393           |
| up PTEN                  | PTEN amplification forward primer                              | GCTTCTGCCATCTCTCTCTCC                | plus               | 22     | 983   | 1004  | 63,9  |                |
| down PTEN                | PTEN amplification reverse primer                              | TCTGACACAATGCTCAATGGC                | minus              | 22     | 2343  | 2322  | 58,3  | 1360           |
| up ADAMTSL3              | ADAMTSL3 amplification forward primer                          | GCTACACACTGAGACCCGGAGG               | plus               | 21     | 192   | 212   | 59,3  |                |
| down ADAMTSL3            | ADAMTSL3 amplification reverse primer                          | CTTCCACAGCAGCATGAC                   | minus              | 21     | 5322  | 5312  | 59,8  | 5130           |
| up GUCY1A2               | GUCY1A2 amplification forward primer                           | GUCY1A2 amplification forward primer | plus               | 20     | 293   | 313   | 59,3  |                |
| down GUCY1A2             | GUCY1A2 amplification reverse primer                           | GAGGAGTCTTGTCTGTAGCAGG               | minus              | 24     | 2615  | 2592  | 62,7  | 2322           |
| up SMAD2                 | SMAD2 amplification forward primer                             | AGAGGCTGTTTCTAGCGTGG                 | plus               | 22     | 206   | 227   | 62,1  |                |
| down SMAD2               | SMAD2 amplification reverse primer                             | CCATAGGGACACACAATGCG                 | minus              | 22     | 1729  | 1707  | 62,1  | 1523           |
| up OR51E1                | OR51E1 amplification forward primer                            | GGTGCTGGTCAAGTCTCAGC                 | plus               | 20     | 119   | 138   | 62,1  |                |
| down OR51E1              | OR51E1 amplification reverse primer                            | CTGAAATCAGAGGACTCTGAATGG             | minus              | 23     | 1147  | 1125  | 60,6  | 1028           |
| up TCF7L2                | TCF7L2 amplification forward primer                            | CCAAATGCTGCTGGTGGG                   | plus               | 20     | 478   | 497   | 59,3  |                |
| down TCF7L2              | TCF7L2 amplification reverse primer                            | AACAATAACTTTCAAGGTGGG                | minus              | 22     | 2387  | 2366  | 58,3  | 1909           |
| up MAP2K7                | MAP2K7 amplification forward primer                            | GAGATGGCGGCTCTC                      | plus               | 18     | 63    | 79    | 60,5  |                |
| CAN01 TNN for            | TNN amplification forward primer                               | TCTGCTCCCTGTCTTCCAAGG                | plus               | 22     | 92    | 113   | 62,1  |                |
| CAN02 TNN rev            | TNN amplification reverse primer                               | TCTCTGCGGAGGACTGCTCAC                | minus              | 21     | 4044  | 4026  | 63,7  | 3950           |
| CAN03 EPHA3 for          | EPH A3 amplification forward primer                            | GCTAGATATGCTCTCACTGC                 | plus               | 23     | 187   | 209   | 62,4  |                |
| CAN04 EPHA3 rev          | EPH A3 amplification reverse primer                            | TCTCTGCGGAGGATGATGCTAC               | minus              | 23     | 3247  | 3225  | 62,4  | 3060           |
| CAN05 MAP2K7 for         | MAP2K7 amplification forward primer                            | TTCCTGGGAAACAGAAGCTGCT               | plus               | 23     | 75    | 97    | 64,2  | 1381           |
| CAN06 ADAMTSL3 for       | ADAMTSL3 amplification forward primer                          | ATTCGCGCAGGAGTTGACG                  | plus               | 21     | 86    | 106   | 62,4  |                |
| CAN07 ADAMTSL3 sv rev    | ADAMTSL3 splice variant amplification reverse primer           | TTTGTGTGGATGCTCTCTG                  | minus              | 22     | 58,1  | 58,1  | 115,4 |                |
| CAN08 GUCY1A2 for        | GUCY1A2 amplification forward primer                           | TTAAGTGTGCTGCTGGCGTCC                | plus               | 23     | 296   | 318   | 64,2  | 2319           |
| CAN09 OR51E1 for         | OR51E1 amplification forward primer                            | ACATCTTCTCAGCGTTGAGC                 | plus               | 23     | 84    | 106   | 60,6  | 1064           |
| CAN10 TCF7L2 for         | TCF7L2 amplification forward primer                            | TCCTTCAAATGCTGCTGGTGG                | plus               | 23     | 474   | 492   | 60,6  |                |
| CAN11 TCF7L2 rev         | TCF7L2 amplification reverse primer                            | ACATCACTAATGATGCCAATGG               | minus              | 24     | 2432  | 2409  | 62,1  | 1958           |
| CAN12 qRT TNN for        | semi quantitative RT-PCR forward primer                        | ATATGGCCACTGCTCTCGG                  | Plus               | 20     | 2809  | 2828  | 59,95 | 364            |
| CAN13 qRT TNN rev        | semi quantitative RT-PCR reverse primer                        | CCCAGCTGCATCTCTTAAC                  | Minus              | 20     | 3172  | 3153  | 59,84 |                |
| CAN14 qRT NAV3 for       | semi quantitative RT-PCR forward primer                        | TTCAGCAATGCTCACCTTG                  | Plus               | 20     | 4949  | 4968  | 59,99 | 412            |
| CAN15 qRT NAV3 rev       | semi quantitative RT-PCR reverse primer                        | ATGTGATGAAGGAGGCTTGG                 | Minus              | 20     | 5360  | 5341  | 60,07 |                |
| CAN16 qRT EPHA3 for      | semi quantitative RT-PCR forward primer                        | CCACCCAATATCATTGCAC                  | Plus               | 20     | 2259  | 2278  | 60,01 | 329            |
| CAN17 qRT EPHA3 rev      | semi quantitative RT-PCR reverse primer                        | TTGGATCTCCCTCCTCTT                   | Minus              | 20     | 2587  | 2568  | 60,01 |                |
| CAN18 qRT ADAMTSL3 for   | semi quantitative RT-PCR forward primer                        | ACAGGGAGTGTGCCAAG                    | Plus               | 20     | 3687  | 3706  | 60,00 | 394            |
| CAN19 qRT ADAMTSL3 rev   | semi quantitative RT-PCR reverse primer                        | TGACAGGTGCTCTGCATAC                  | Minus              | 20     | 4080  | 4061  | 59,86 |                |
| CAN20 qRT GUCY1A2 for    | semi quantitative RT-PCR forward primer                        | TGGAAAGACCGATTGAGTAG                 | Plus               | 21     | 2211  | 2231  | 60,20 | 357            |
| CAN21 qRT GUCY1A2 rev    | semi quantitative RT-PCR reverse primer                        | ACCATGGTCCGATGTTGTA                  | Minus              | 20     | 2567  | 2548  | 59,85 |                |
| CAN22 qRT OR51E1 for     | semi quantitative RT-PCR forward primer                        | TTCCATACGGTTGAGCCTCT                 | Plus               | 20     | 91    | 110   | 59,69 | 382            |
| CAN23 qRT OR51E1 rev     | semi quantitative RT-PCR reverse primer                        | AGGAGTGGATGGCAACATC                  | Minus              | 20     | 472   | 453   | 59,93 |                |
| CAN24 APC all splvar for | APC(1) amplification all known spliced variant, forward primer | GGCTGCACTCTAATGATCACTGTT             | Plus               | 27     | 88    | 114   | 58,08 | 5107           |
| CAN25 APC exonanal rev   | APC analysis of first 15 exons reverse primer                  | CCACAAGTCCACATGCATCTACTGAC           | Minus              | 27     | 2248  | 2222  | 57,11 | 2053           |
| CAN26 BACT for           | beta ACTIN human amplification forward primer                  | AGCCTGGCTTGGCGATCC                   | Plus               | 20     | 34    | 53    | 59,49 |                |
| CAN27 BACT rev           | beta ACTIN human amplification reverse primer                  | CCCAGGGAGACCAAAAGCTTCA               | Minus              | 23     | 1735  | 1713  | 58,49 | 1701           |
| CAN28 BRAF for           | BRAF amplification forward primer                              | GTTATAAGATGGCGGCGTGG                 | Plus               | 22     | 54    | 75    | 56,01 |                |
| CAN29 BRAF rev           | BRAF amplification reverse primer                              | TTTGTGCTACTCTCTGAACTCTC              | Minus              | 25     | 2400  | 2376  | 54,56 | 2347           |
| up-1247-SMAD4 WT         | PCR typing expression SMAD4 WT in tumor cell lines             | GCCTTTGTTGGGTCAACTCTCCAATG           | Plus               | 28     |       |       | 64    | 629            |
| up-1247-SMAD4 Mut        | PCR typing expression SMAD4 Mut in tumor cell lines            | GCCTTTGTTGGGTCAACTCTCCAATG           | Plus               | 28     |       |       | 65    | 629            |
| up1869-SMAD4 WT          | PCR typing expression SMAD4 WT in tumor cell lines             | CGTGACCTCTGGAGGAGATC                 | Plus               | 23     |       |       | 66    | 640            |
| up1869-SMAD4 Mut         | PCR typing expression SMAD4 Mut in tumor cell lines            | CGTGACCTCTGGAGGAGATC                 | Plus               | 23     |       |       | 64    | 640            |
| up1869-TP53 WT           | PCR typing expression TP53 WT in tumor cell lines              | CACATGACGGAGGTTGTGAGGCG              | Plus               | 23     |       |       | 66    | 729            |
| up1869-TP53 Mut          | PCR typing expression TP53 Mut in tumor cell lines             | CACATGACGGAGGTTGTGAGGCG              | Plus               | 23     |       |       | 64    | 729            |
